# Supplementary material for: Synergistic Effect of Flavonoids and Metformin on Protection of the Methylglyoxal-Induced Damage in PC-12 Neuroblastoma Cells: Structure–Activity Relationship and Potential Target
Source: MDPI journal article supplement (doi:10.3390/molecules29102306), 2024-05-14
Supplement: s1 [file s1]

## **Supplementary Information**

### **Synergistic effect of Flavonoids and Metformin on protection of the Methylglyoxal-Induced Damage in PC-12 Neuroblastoma Cells: Structure- Activity Relationship and Potential Target**

Danyang Zhang <sup>1</sup>, Xiaoshi He <sup>1</sup>, Ting Wang <sup>2</sup>, Yan Xing <sup>1</sup>, Jing Wang <sup>2</sup>, Zhilong Xiu <sup>1</sup>,  
Yongming Bao <sup>1,3</sup>, Zhansheng Zhao <sup>2\*</sup>, Yuesheng Dong <sup>1\*</sup>

1 MOE Key Laboratory of Bio-Intelligent Manufacturing, School of Bioengineering,  
Dalian University of Technology, Dalian, 116024, China

2 Department of Endocrinology, The Second Hospital of Hebei Medical University,  
Shijiazhuang, Hebei, 050000, China

3 School of Ocean Science and Technology, Dalian University of Technology, Panjin,  
124221, China

\* To whom correspondence should be addressed:

Zhansheng Zhao, Department of Endocrinology, The Second Hospital of Hebei  
Medical University, No.215 Heping West Road, Shijiazhuang, 050000, China.

Email: zhshzhao@sina.com

Yuesheng Dong, School of Bioengineering, Dalian University of Technology. No. 2  
Linggong Road, Dalian, 116024, China.

E-mail: yshdong@dlut.edu.cn

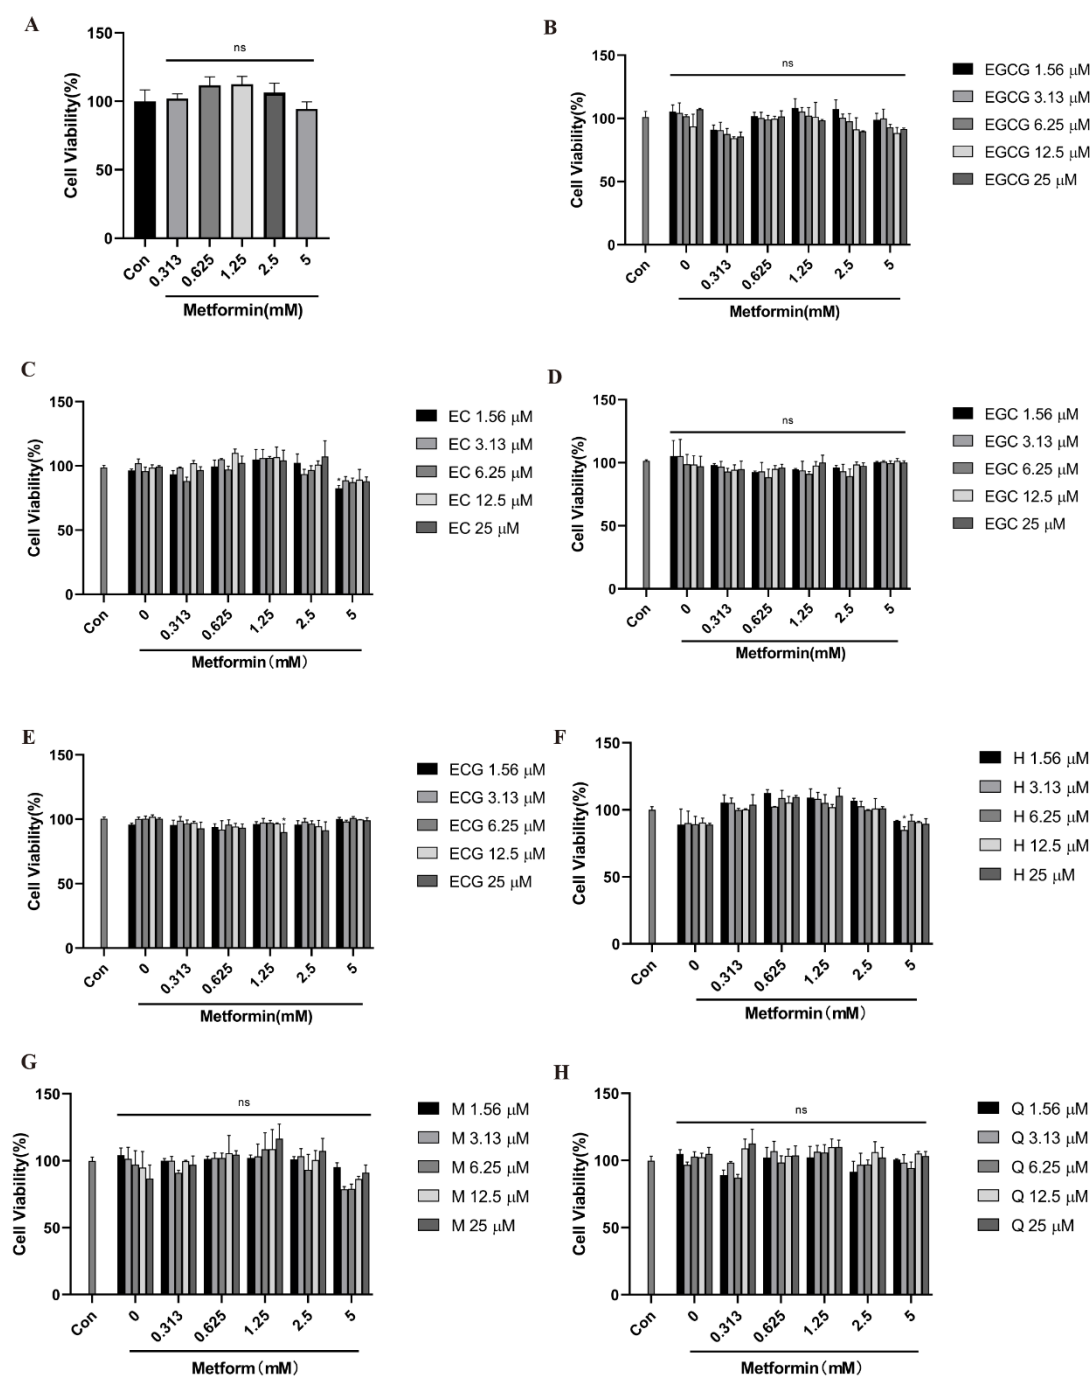

**Figure S1 Cell viability of drug combinations on PC-12 cells. Data shown are the mean  $\pm$  SD of three independent experiments. n.s. indicate no significant differences between the two groups. ( $p>0.05$ )**

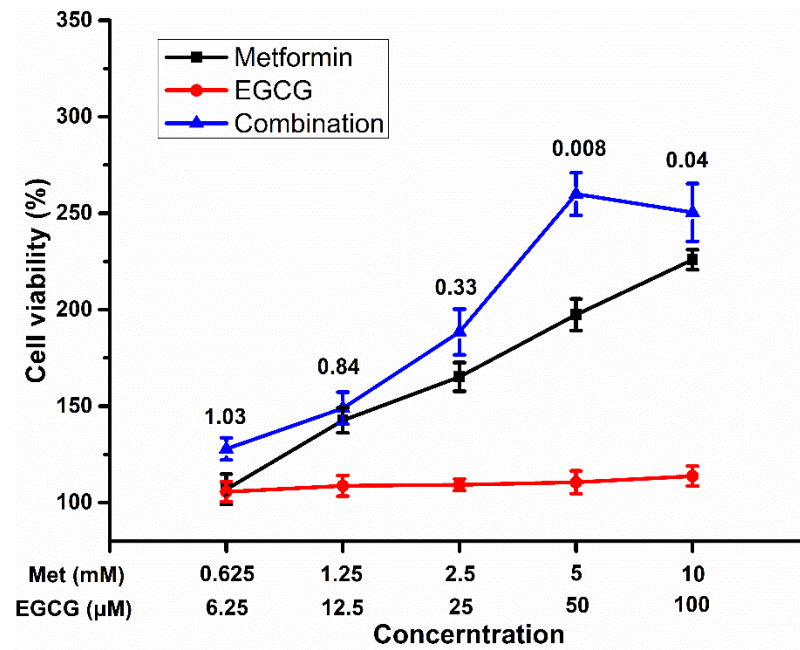

**Figure S2 Protective effect of the combination of metformin and EGCG against MG-induced SH-SY5Y cells.**
